# Supplementary material for: Structural Characterization of Polygonatum Cyrtonema Polysaccharide and Its Immunomodulatory Effects on Macrophages
Source: MDPI journal article supplement (doi:10.3390/molecules29092076), 2024-04-30
Supplement: s1 [file s1]

## **Supplementary Material**

### **Contents:**

Figure S1. Chromatogram of Dextran standard.

Figure S2. Methylation analysis chromatogram of NPCP.

Figure S3. Mass fragments of methylation produce.

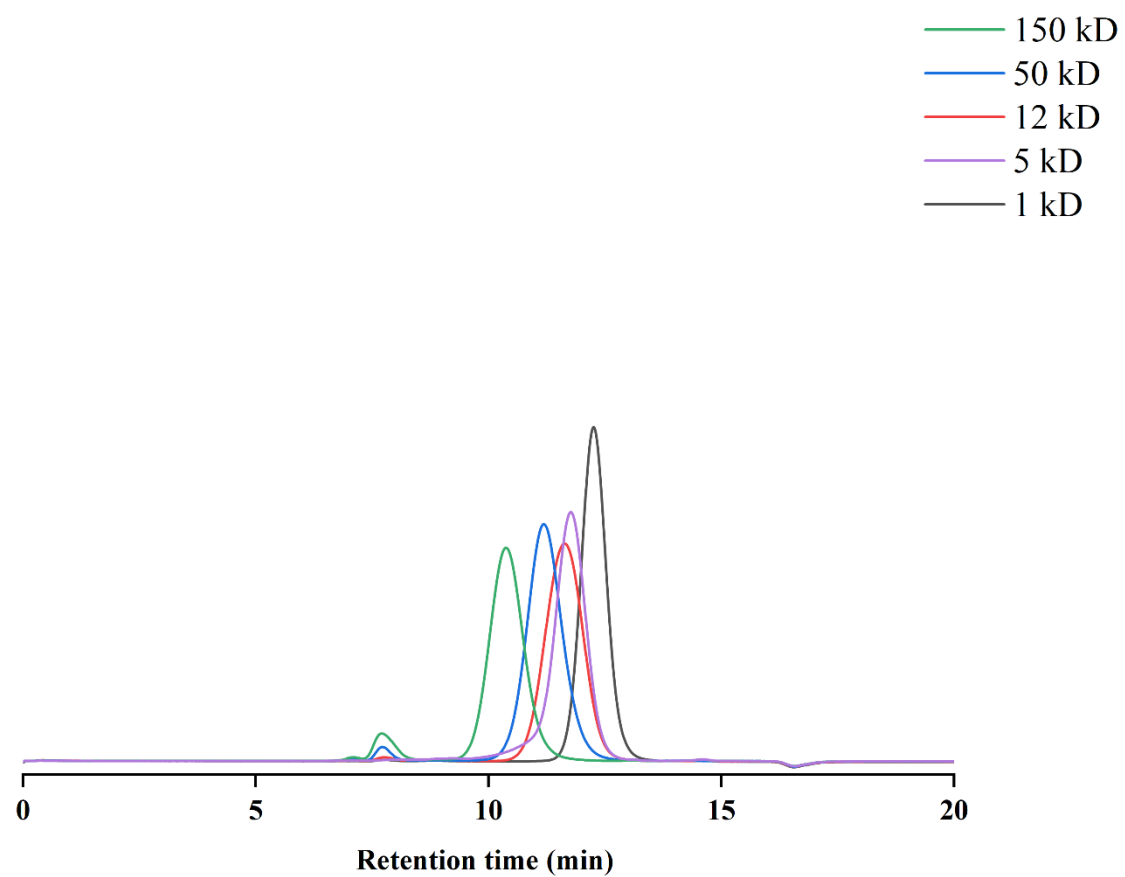

**Figure S1.** Chromatogram of Dextran standard.

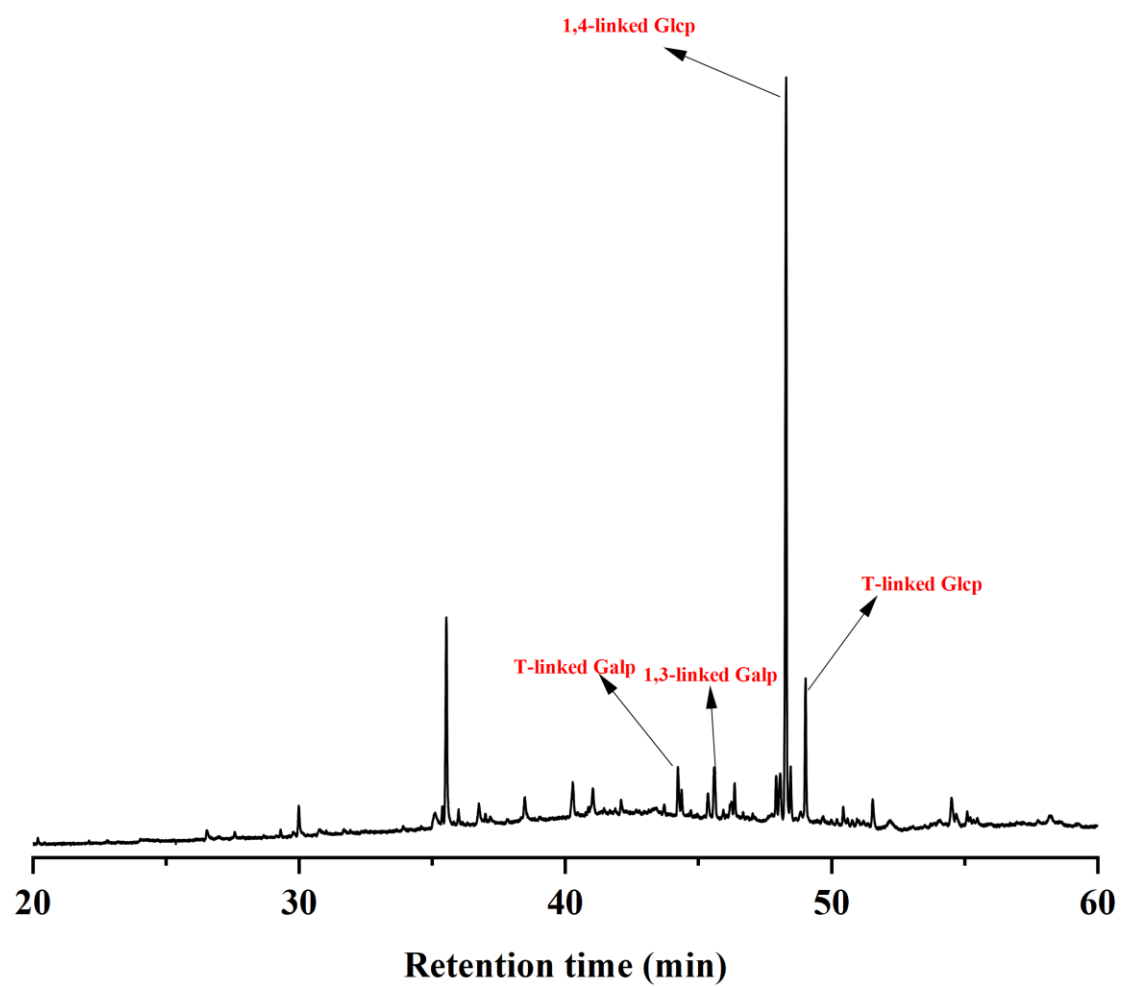

**Figure S2.** Methylation analysis chromatogram of NPCP.

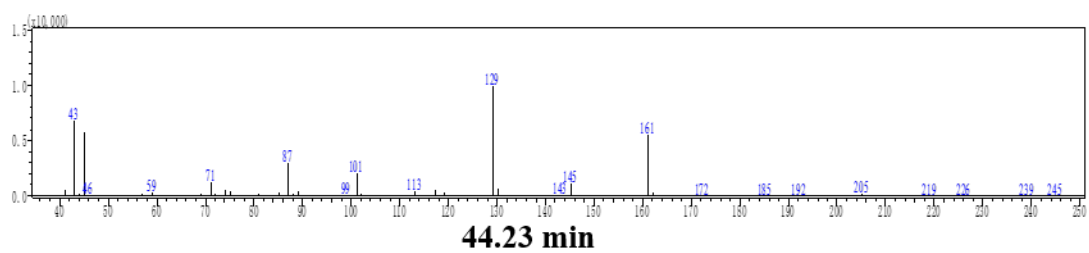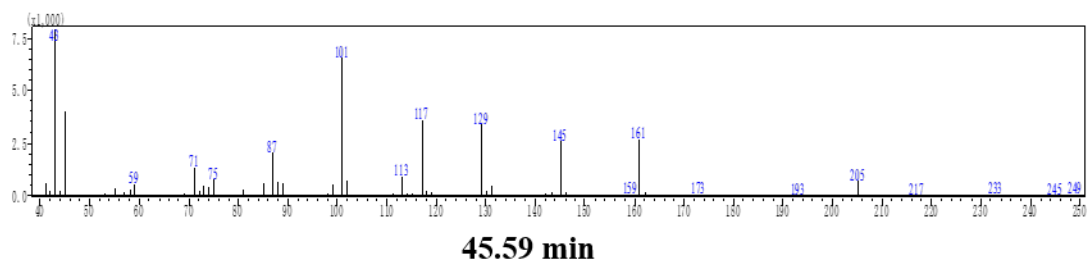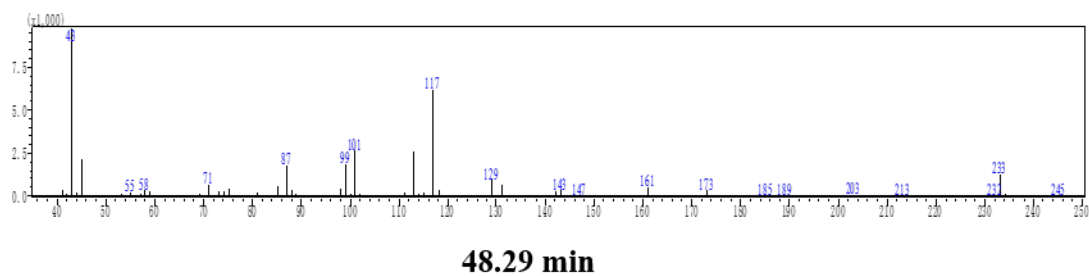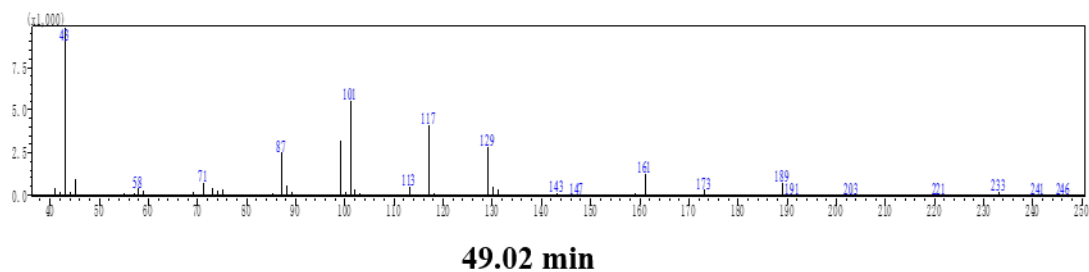

**Figure S3.** Mass fragments of methylation produce.
